# Supplementary material
Source: Research Square preprint supplement (doi:10.21203/rs.3.rs-9544539/v1)
Supplement: Supplementary file 1 [file e76963709d12fe80482f7b7c.docx]

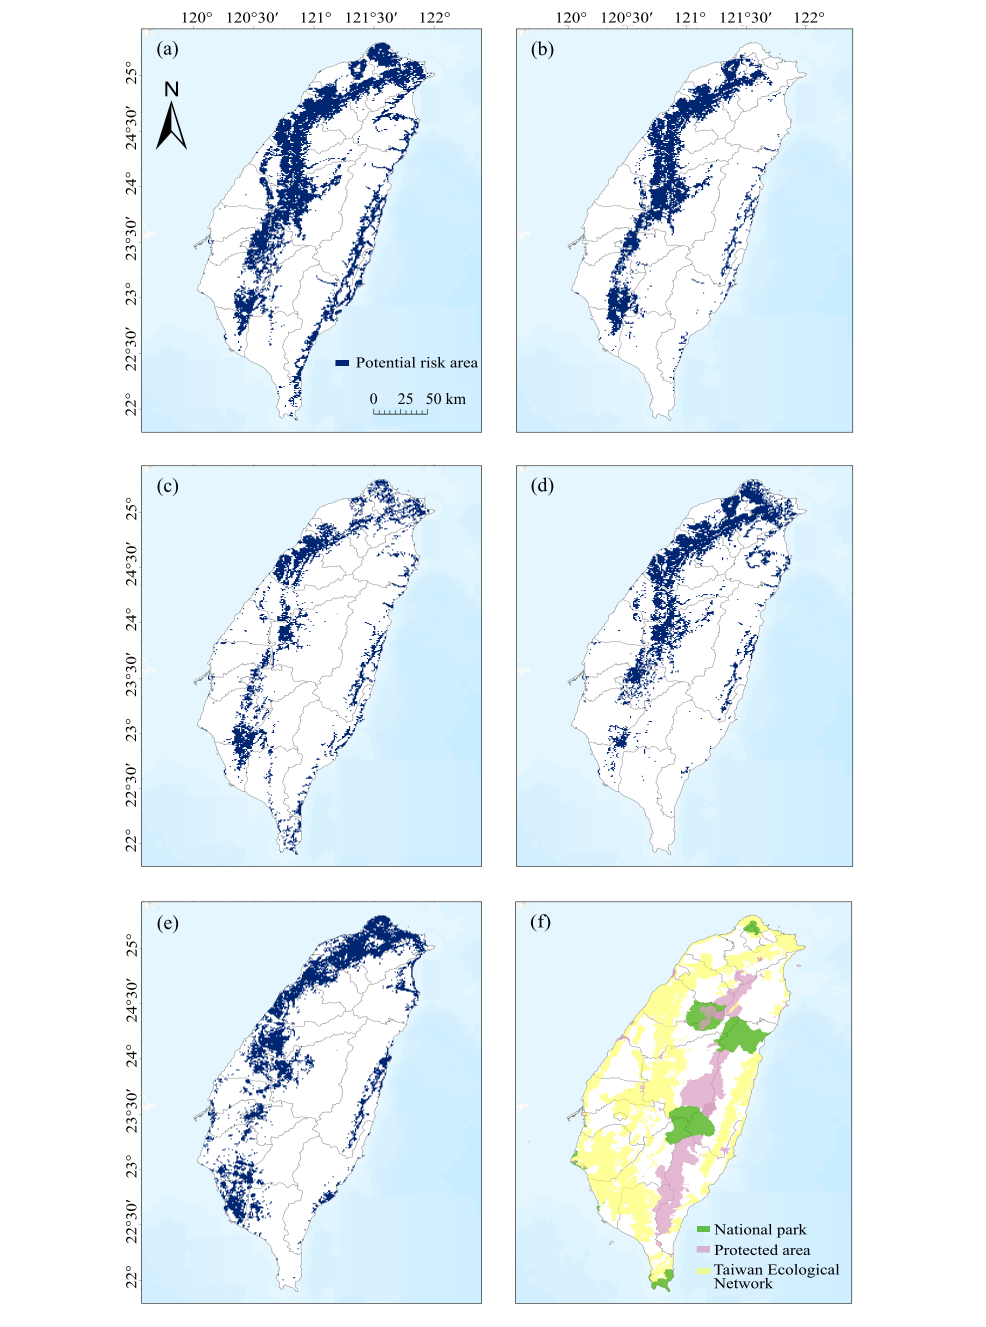


**Supplementary Fig. 1** Binary maps of potential risk areas for dog attacks on (a) Reeves’ muntjac, (b) Chinese pangolin, (c) crab-eating mongoose, (d) ferret badger, and (e) masked palm civet; and (f) the spatial distribution of statutory protected areas and the Taiwan Ecological Network.

**Table S1.** Sources of species occurrence data (derived exclusively from camera trapping surveys).

| Data source | Location | Year | No. of trapping sites |
| --- | --- | --- | --- |
| Chen et al., 2020 | Nantou County | 2018-2022 | 32 |
| Cheng et al., 2021 | Taichung City | 2021-2022 | 10 |
| Ho et al., 2024 | Kaohsiung City | 2020-2021 | 58 |
| Li & Sun, 2024 | Tainan City and Kaohsiung City | 2022-2023 | 60 |
| Li & Sun, 2023a | Taichung City | 2022-2023 | 47 |
| Li & Sun, 2023b | Hualien County | 2021-2023 | 40 |
| Lin et al., 2020 | Nantou County, Changhua County, and Miaoli County | 2012-2019 | 112 |
| Liu et al., 2023 | Entire Taiwan | 2010-2021 | 692 |
| Weng and Liu, 2020 | Entire Taiwan | 2018-2021 | 183 |
| Yen et al., 2019 | Taipei City and New Taipei City | 2012-2017 | 140 |
| Yen et al., 2018 | Hualien County | 2016-2017 | 38 |

**Table S2.** Environmental variables used in the study. Variables retained after the multicollinearity test are highlighted in bold.

| Variables | Unit | Data Source |
| --- | --- | --- |
| Climate |  | Taiwan Climate Change Projection Information and Adaptation Knowledge Platform https://tccip.ncdr.nat.gov.tw |
| Bio 1 = Annual Mean Temperature | °C |  |
| Bio 2 = Mean Diurnal Range | °C |  |
| Bio 5 = Max Temperature of Warmest Month | °C |  |
| Bio 6 = Max Temperature of Coldest Month | °C |  |
| Bio 7 = Temperature Annual Range | °C |  |
| Bio 8 = Mean Temperature of Wettest Quarter | °C |  |
| Bio 9 = Mean Temperature of Driest Quarter | °C |  |
| Bio 10 = Mean Temperature of Warmest Quarter | °C |  |
| Bio 11 = Mean Temperature of Coldest Quarter | °C |  |
| Bio 12 = Annual Precipitation | mm |  |
| Bio 13 = Precipitation of Wettest Month | mm |  |
| Bio 14 = Precipitation of Driest Month | mm |  |
| Bio 16 = Precipitation of Wettest Quarter | mm |  |
| Bio 17 = Precipitation of Driest Quarter | mm |  |
| Topography |  | DTM <https://data.gov.tw/dataset/138563>  OSM https://download.geofabrik.de/asia.html |
| Elevation | m |  |
| Standard deviation of elevation | m |  |
| Waterway density | km/km² |  |
| Land-cover |  | ESRI https://livingatlas.arcgis.com/landcover/ |
| Forest coverage | % |  |
| Crop coverage | % |  |
| Rangeland coverage | % |  |
| Anthropogenic |  | OpenStreetMap https://download.geofabrik.de/asia.html |
| Road density | km/km² |  |
| Dog-related predictor |  |  |
| Probability of dog occurrence | 0-1 | Species Distribution Model from the current study |
| Dog density | no./km2 | (Chao 2020) |

**Table S3.** Summary of MaxEnt model results for species distribution, including model performance (AUC), thresholds used for binarization (minimum training presence), and the predicted distribution area for each focal species.

| Species | Test AUC  (Mean ± SD) | Threshold | Area (km²) |
| --- | --- | --- | --- |
| Reeves’ muntjac | 0.798 ± 0.034 | 0.0832 | 26672 |
| Chinese pangolin | 0.830 ± 0.039 | 0.0304 | 24685 |
| Crab-eating mongoose | 0.828 ± 0.035 | 0.0464 | 26125 |
| Ferret badger | 0.786 ± 0.035 | 0.0344 | 29781 |
| Masked palm civet | 0.778 ± 0.034 | 0.0125 | 34510 |
| Domestic dog | 0.773 ± 0.034 | - | - |

**Table S4.** Relative contribution (%) of environmental predictor variables to the Species Distribution Models for the five native mammal species and free-roaming dogs.

| Environmental variables | Reeves’ muntjac | Chinese pangolin | Crab-eating mongoose | Ferret badger | Masked palm civet | Domestic dogs |
| --- | --- | --- | --- | --- | --- | --- |
| Forest coverage | 40.4 | 41.7 | 38.3 | 38 | 31.1 | 16 |
| Road density | 13.9 | 23.6 | 23.8 | 23 | 28 | 55.4 |
| Elevation | 8.6 | 13.2 | 9.1 | 9.6 | 10.9 | 8.5 |
| Bio 7 | 9.5 | 3.8 | 5.9 | 7.5 | 7.5 | 4.5 |
| Bio 2 | 8.4 | 8.8 | 7.9 | 2.2 | 5.0 | 3.2 |
| Bio 17 | 6.9 | 1.5 | 10.3 | 3.5 | 4.4 | 2.3 |
| Bio 12 | 4.4 | 0.3 | 1.1 | 8.3 | 7.5 | 4.5 |
| Bio 16 | 6.1 | 3.7 | 2.5 | 5.1 | 3.6 | 0.9 |
| Crop coverage | 1 | 2.3 | 0.8 | 1.7 | 1.6 | 3.2 |
| Waterway density | 0.4 | 1 | 0.1 | 0.3 | 0.3 | 0.9 |
| Rangeland coverage | 0.5 | 0.1 | 0.1 | 0.8 | 0.1 | 0.5 |
